# Supplementary material for: Direct analysis of steviol glycosides from Stevia leaves by ambient ionization mass spectrometry performed on whole leaves
Source: Royal Society of Chemistry journal article supplement (doi:10.1039/c2an16263f), 2012-01-01
Supplement: c2an16263f.pdf [file c2an16263f.pdf]

Supplementary Information

Direct Analysis of Steviol Glycosides from  
*Stevia* Leaves by Ambient Ionization Mass  
Spectrometry from Whole Leaf

*J. Isabella Zhang,<sup>§a</sup> Xin Li,<sup>§a</sup> Zheng Ouyang<sup>b</sup>, R. Graham Cooks\*<sup>a</sup>*

<sup>a</sup> Department of Chemistry, Purdue University, West Lafayette, Indiana 47907, USA

<sup>b</sup> Weldon School of Biomedical Engineering, Purdue University, West Lafayette, Indiana  
47907, USA

<sup>§</sup>These authors contributed equally to this work.

\*Correspondence to: Dr. R. Graham Cooks, Department of Chemistry, Purdue  
University, West Lafayette, Indiana 47907, USA. Phone: 765-494-5262. Fax: 765-494-  
9421. E-mail: [cooks@purdue.edu](mailto:cooks@purdue.edu).

### Supplementary Data:

**Figure S-1** Positive ion mode leaf spray mass spectrum of fresh *Stevia* leaf recorded under nitrogen to avoid the oxygen in the air. No oxidation products of *Stevia* glycosides are observed from full scan mass spectrum.

**Figure S-2** a) Positive ion mode LTP mass spectrum for fresh untreated *Stevia* leaf. No *Stevia* glycosides are observed directly from full scan mass spectrum. b) Positive ion mode paper spray mass spectrum for a piece of *Stevia* leaf on paper.

**Figure S-3** a) MS<sup>2</sup> and b) MS<sup>3</sup> spectra of 787 [M-H]<sup>-</sup>, M represents dulcoside A, which is not observed directly in the negative ion mode full scan leaf spray mass spectrum of fresh *Stevia* leaves.

**Figure S-4** Leaf spray tandem mass spectra of fresh *Stevia* leaves to verify the presence of *Stevia* glycosides which are not observed directly from full scan mass spectrum. a) MS<sup>2</sup> of *m/z* 641 [M-H]<sup>-</sup>, in the negative ion mode, M represents steviolbioside/rubusoside (isomers), b) MS<sup>2</sup> of 677 [M+Cl]<sup>-</sup>, in the negative ion mode, M represents steviolbioside/rubusoside (isomers), c) MS<sup>2</sup> of 971 [M+Cl]<sup>-</sup>, in the negative ion mode, M represents rebaudioside F, d) MS<sup>2</sup> of *m/z* 1167, in the positive ion mode, e) MS<sup>2</sup> of *m/z* 1127, in the negative ion mode. Paper spray tandem mass spectra of rebaudioside D standard, f) MS<sup>2</sup> of 1167 [M+K]<sup>+</sup>, in the positive ion mode, g) MS<sup>2</sup> of 1127 [M-H]<sup>-</sup>, in the negative ion mode, M represents rebaudioside D.

**Figure S-5** Positive ion mode leaf spray mass spectra of *Stevia* leaf in different conditions, a) dehydrated *Stevia* Leaf and b) stalk of *Stevia* Leaf.

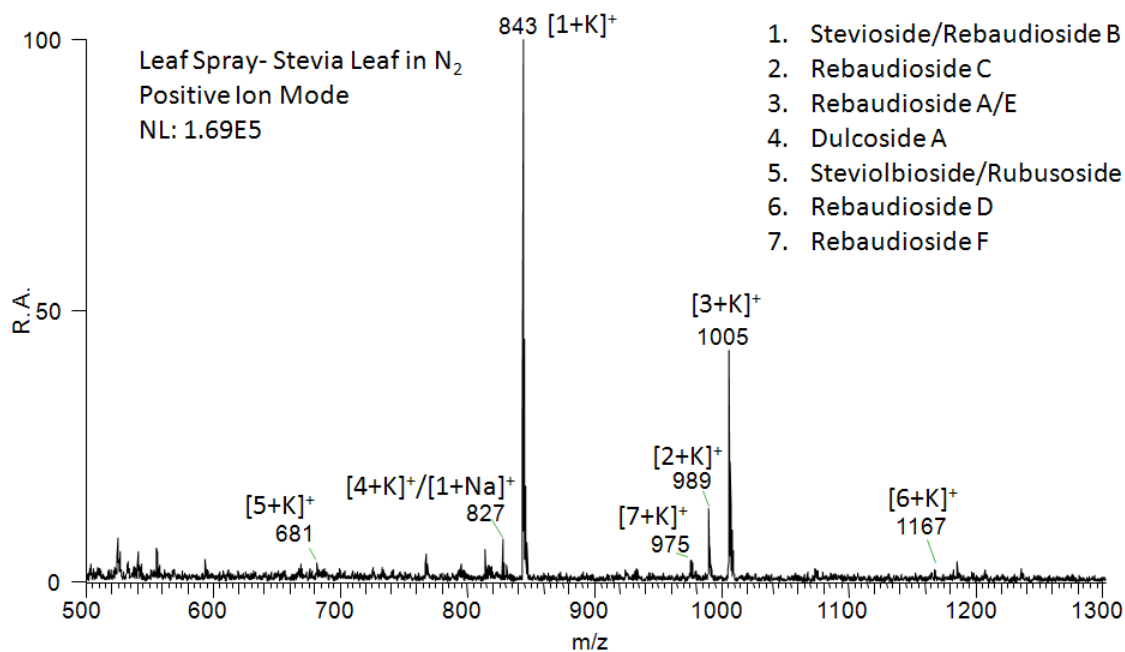

**Figure S-1** Positive ion mode leaf spray mass spectrum of fresh *Stevia* leaf recorded under nitrogen to avoid the oxygen in the air. No oxidation products of *Stevia* glycosides are observed from full scan mass spectrum.

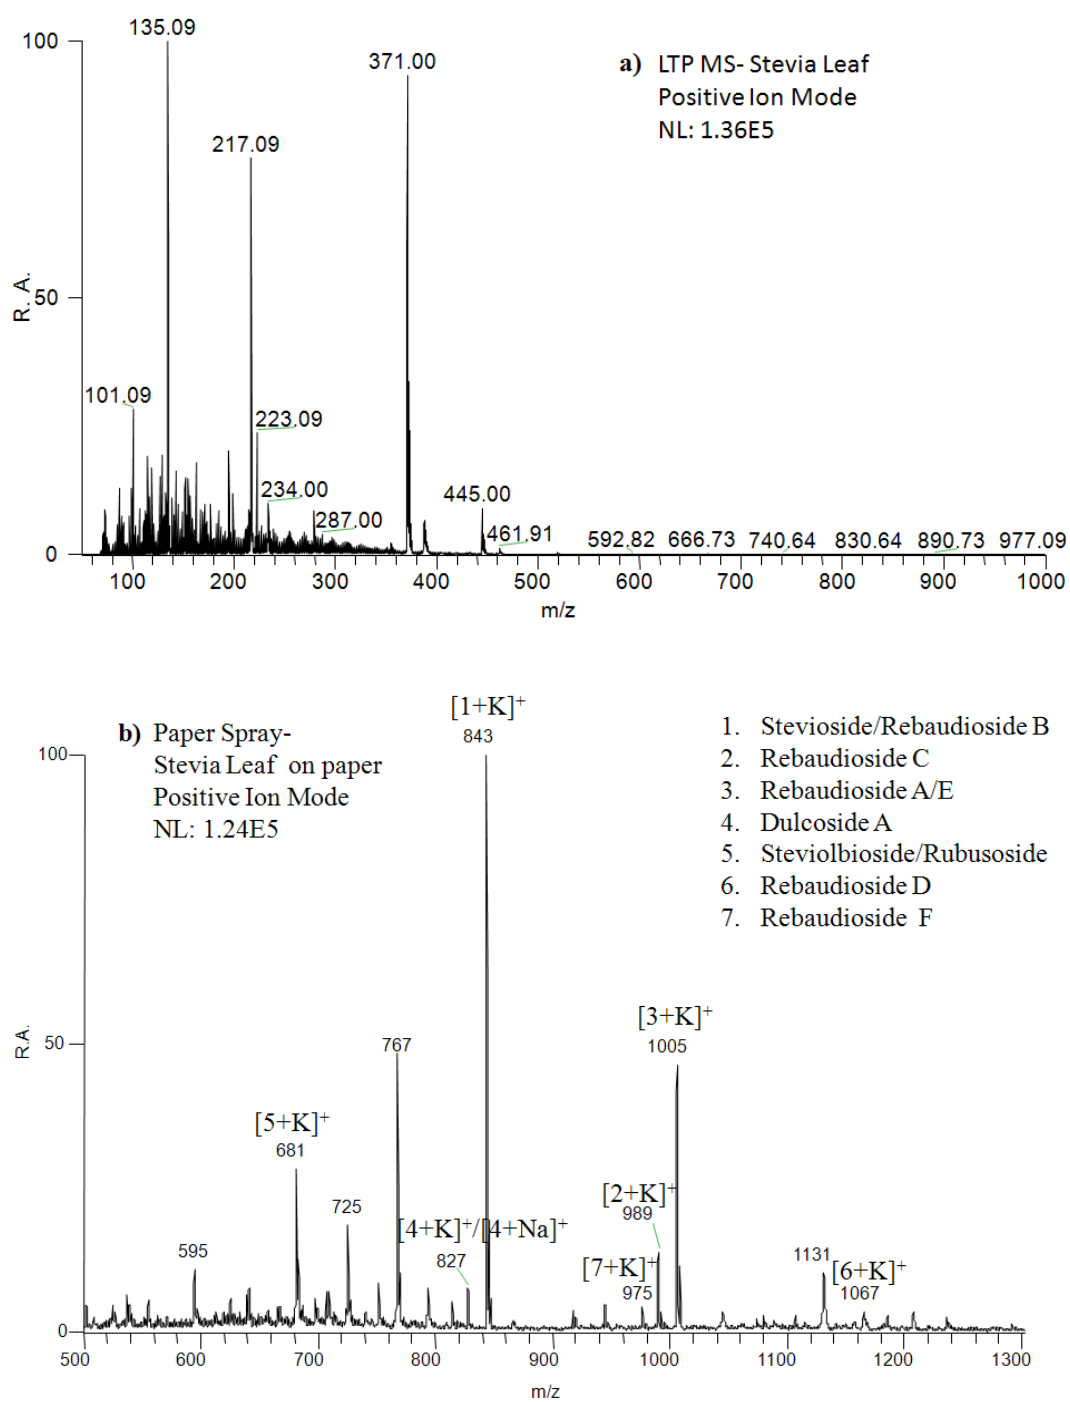

**Figure S-2** a) Positive ion mode LTP mass spectrum for fresh untreated *Stevia* leaf. No *Stevia* glycosides are observed directly from full scan mass spectrum. b) Positive ion mode paper spray mass spectrum for a piece of *Stevia* leaf on paper.

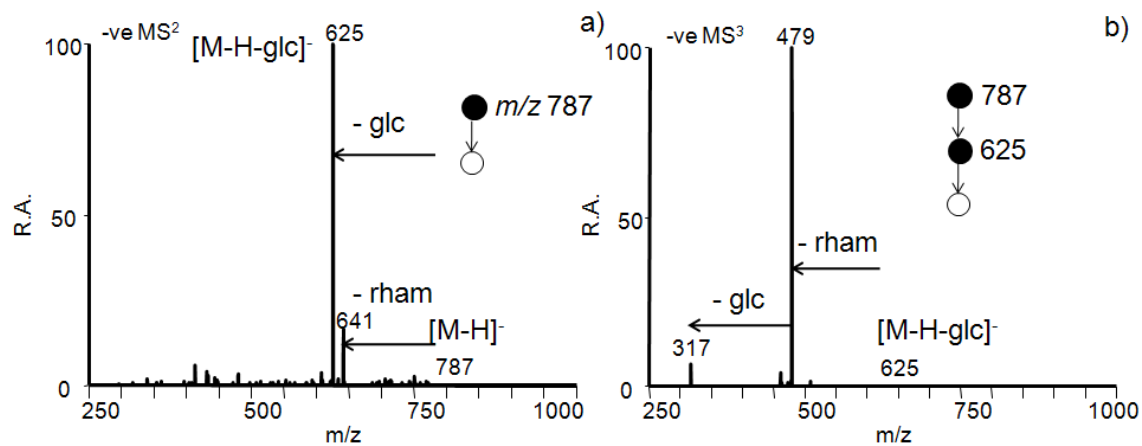

**Figure S-3** a)  $MS^2$  and b)  $MS^3$  spectra of 787  $[M-H]^-$ , M represents dulcoside A, which is not observed directly in the negative ion mode full scan leaf spray mass spectrum of fresh *Stevia* leaves.

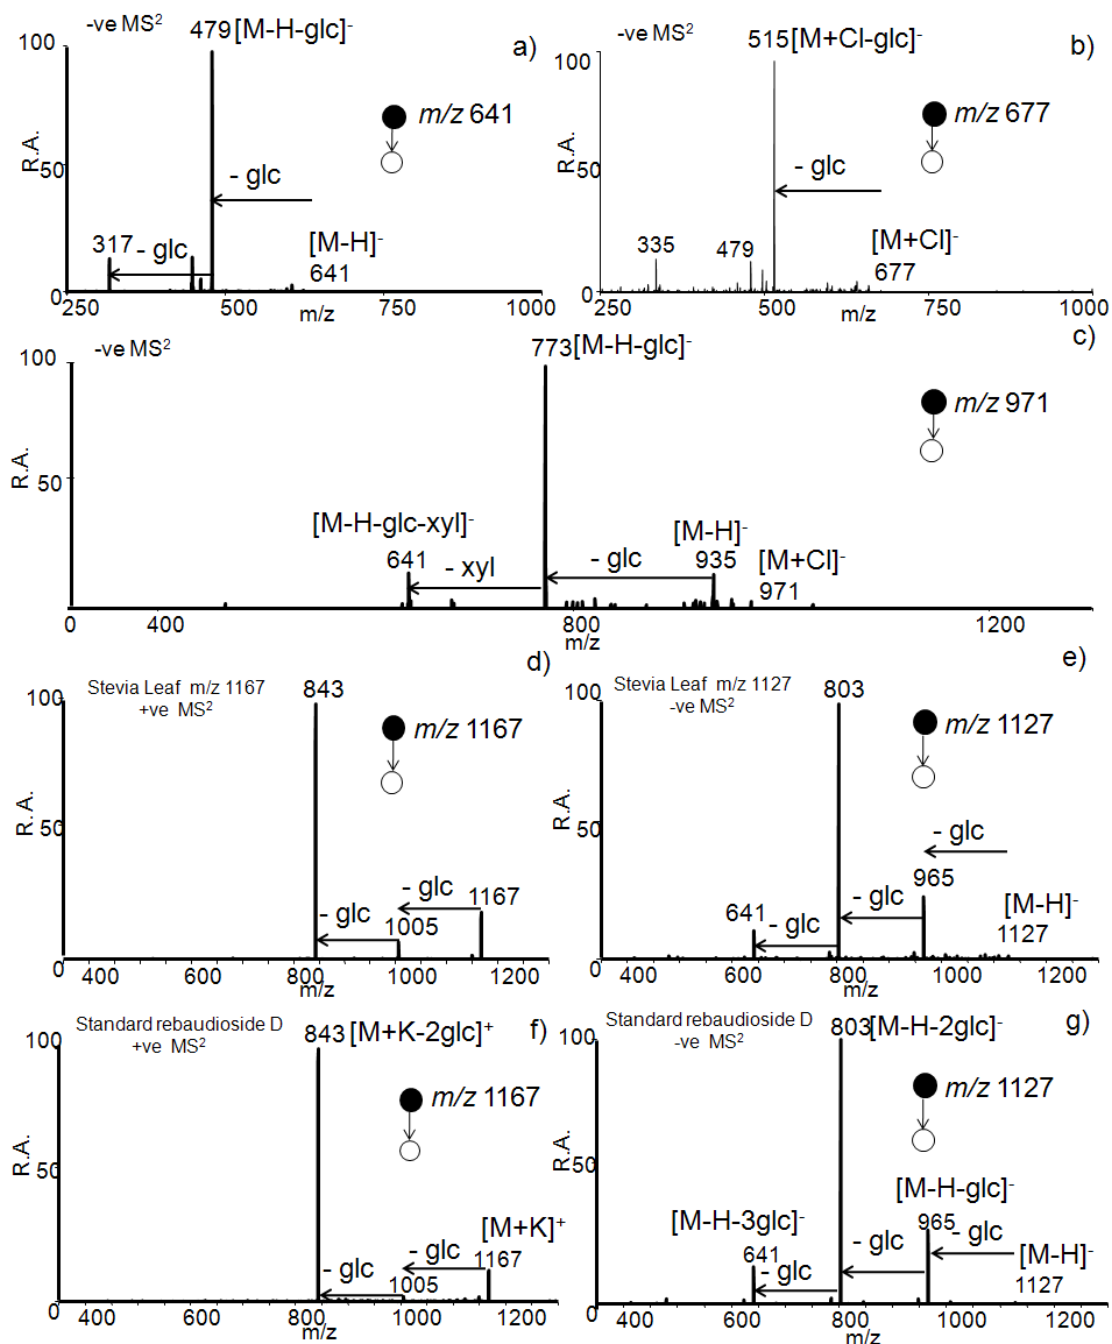

**Figure S-4** Leaf spray tandem mass spectra of fresh *Stevia* leaves to verify the presence of *Stevia* glycosides which are not observed directly from full scan mass spectrum. a) MS<sup>2</sup> of m/z 641 [M-H]<sup>-</sup>, in the negative ion mode, M represents steviolbioside/rubusoside (isomers), b) MS<sup>2</sup> of 677 [M+Cl]<sup>-</sup>, in the negative ion mode, M represents steviolbioside/rubusoside (isomers), c) MS<sup>2</sup> of 971 [M+Cl]<sup>-</sup>, in the negative ion mode, M represents rebaudioside F, d) MS<sup>2</sup> of m/z 1167, in the positive ion mode, e) MS<sup>2</sup> of m/z 1127, in the negative ion mode. Paper spray tandem mass spectra of rebaudioside D standard, f) MS<sup>2</sup> of 1167 [M+K]<sup>+</sup>, in the positive ion mode, g) MS<sup>2</sup> of 1127 [M-H]<sup>-</sup>, in the negative ion mode, M represents rebaudioside D.

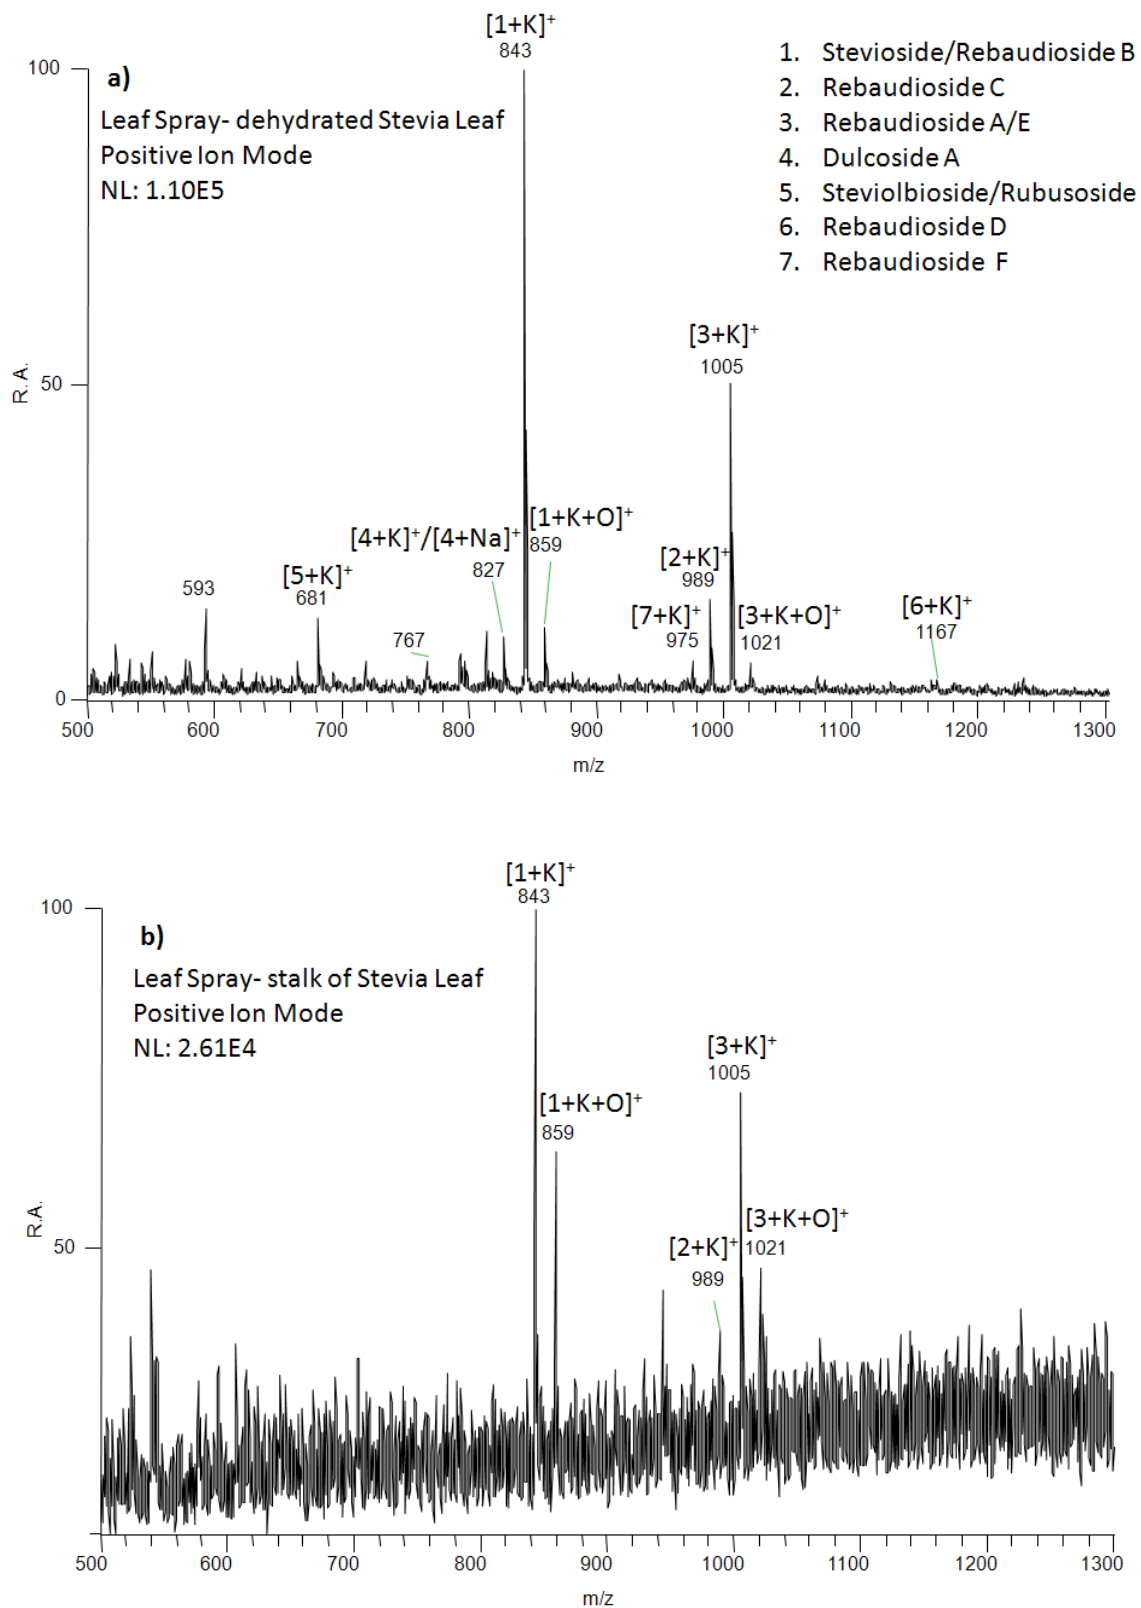

**Figure S-5** Positive ion mode leaf spray mass spectra of Stevia leaf in different conditions, a) dehydrated Stevia Leaf and b) stalk of Stevia Leaf.
